# Supplementary material for: 2D and 3D lanthanide coordination polymers constructed from benzimidazole-5,6-dicarboxylic acid and sulfate bridged secondary building units
Source: Royal Society of Chemistry journal article supplement (doi:10.1039/b910701k), 2010-01-01
Supplement: b910701k.pdf [file b910701k.pdf]

## Supporting materials for

### **2D and 3D lanthanide coordination polymers constructed from benzimidazole-5,6-dicarboxylic acid and sulfate anions bridged secondary building units**

*Zhao-Xi Wang, \* Qiong-Fang Wu, Hong-Jiang Liu, Min Shao, Hong-Ping Xiao, and Ming-Xing Li\**

\*Corresponding Author: Zhao-Xi Wang, Ming-Xing Li

Telephone number: (+86) 21 66132670

Fax number: (+86) 21 66132797

Email address: zxwang@shu.edu.cn; mx\_li@mail.shu.edu.cn.

**Table S1. Selected bond lengths for 1, 2, and 4**

|              | 1(La)    | 2(Pr)    | 4(Gd)    |
|--------------|----------|----------|----------|
| Ln(1)-O(2)   | 2.536(8) | 2.500(5) | 2.420(4) |
| Ln(1)-O(3)   | 2.490(8) | 2.449(6) | 2.363(4) |
| Ln(1)-O(4C)  | 2.479(8) | 2.440(6) | 2.320(4) |
| Ln(1)-O(5)   | 2.458(8) | 2.422(6) | 2.372(4) |
| Ln(1)-O(6B)  | 2.430(8) | 2.381(6) | 2.380(4) |
| Ln(1)-O(8)   | 2.546(8) | 2.510(6) | 2.433(4) |
| Ln(1)-O(9)   | 2.576(8) | 2.541(6) | 2.438(4) |
| Ln(1)-O(12A) | 2.559(8) | 2.508(6) | 2.504(4) |
| Ln(2)-O(1A)  | 2.674(9) | 2.630(6) | 2.417(4) |
| Ln(2)-O(2A)  | 2.608(8) | 2.571(6) | 2.663(4) |
| Ln(2)-O(7)   | 2.534(9) | 2.486(6) | 2.562(4) |
| Ln(2)-O(8)   | 2.710(8) | 2.683(6) | 2.489(4) |
| Ln(2)-O(9)   | 2.703(9) | 2.673(6) | 2.583(4) |
| Ln(2)-O(10A) | 2.499(8) | 2.454(6) | 2.376(4) |
| Ln(2)-O(12)  | 2.649(8) | 2.624(6) | 2.623(4) |
| Ln(2)-O(13)  | 2.559(9) | 2.530(6) | 2.473(4) |
| Ln(2)-O(14)  | 2.546(9) | 2.506(6) | 2.445(4) |
| Ln(2)-O(15)  | 2.552(9) | 2.519(6) | 2.437(4) |

Symmetry codes: A: -x+1, -y+2, -z; B: -x, -y+1, -z; C: -x+1, -y+1, -z.

**Table S2. Selected bond lengths for 5, 6, and 8**

|             | <b>5(Eu)</b> | <b>6(Tb)</b> | <b>8(Er)</b> |
|-------------|--------------|--------------|--------------|
| Ln(1)-O(1)  | 2.395(12)    | 2.383(12)    | 2.374(10)    |
| Ln(1)-O(2)  | 2.554(9)     | 2.542(9)     | 2.504(10)    |
| Ln(1)-O(2A) | 2.379(9)     | 2.361(9)     | 2.348(10)    |
| Ln(1)-O(3A) | 2.245(8)     | 2.226(9)     | 2.198(9)     |
| Ln(1)-O(4B) | 2.322(9)     | 2.304(10)    | 2.291(10)    |
| Ln(1)-O(5)  | 2.370(16)    | 2.35(2)      | 2.318(19)    |
| Ln(1)-O(6A) | 2.394(12)    | 2.368(13)    | 2.332(12)    |
| Ln(1)-N(1C) | 2.546(9)     | 2.531(10)    | 2.508(10)    |

Symmetry codes: A: -x+1, -y+1, -z+1; B: x, -y+1/2, z-1/2; C: -x+2, -y+1, -z+1.

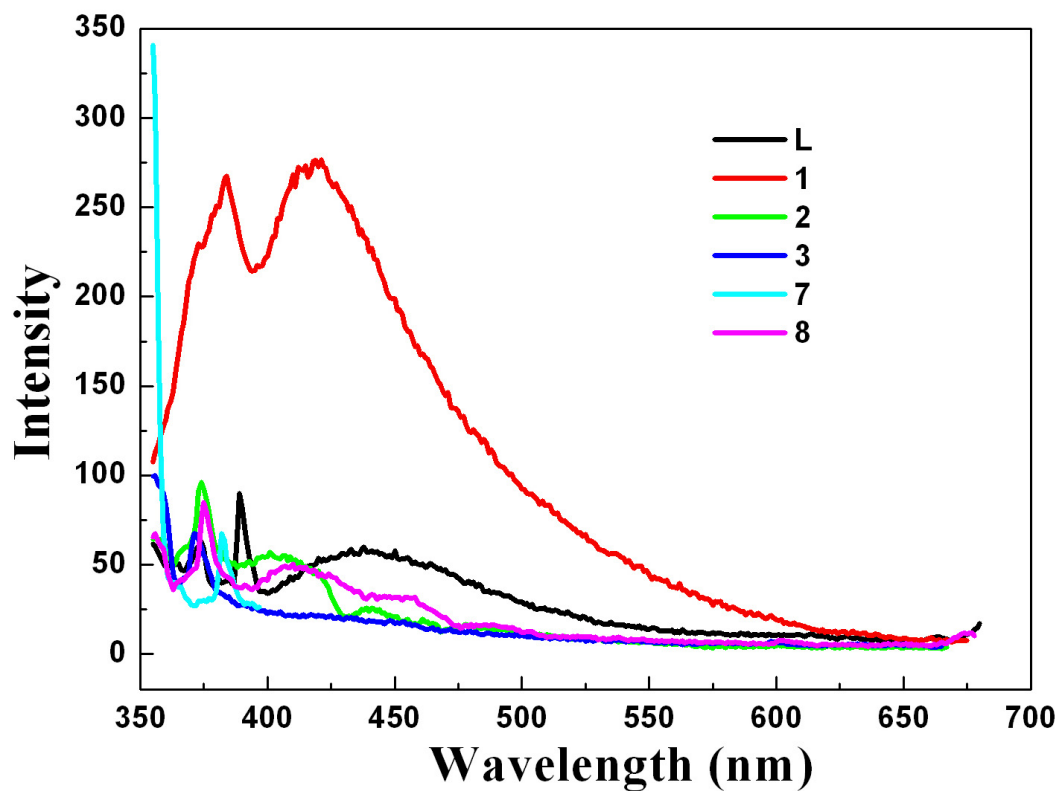

**Fig. S1** Solid-state emission spectra of complexes 1, 2, 3, 7, 8, and H<sub>3</sub>bidc (L) at room temperature.

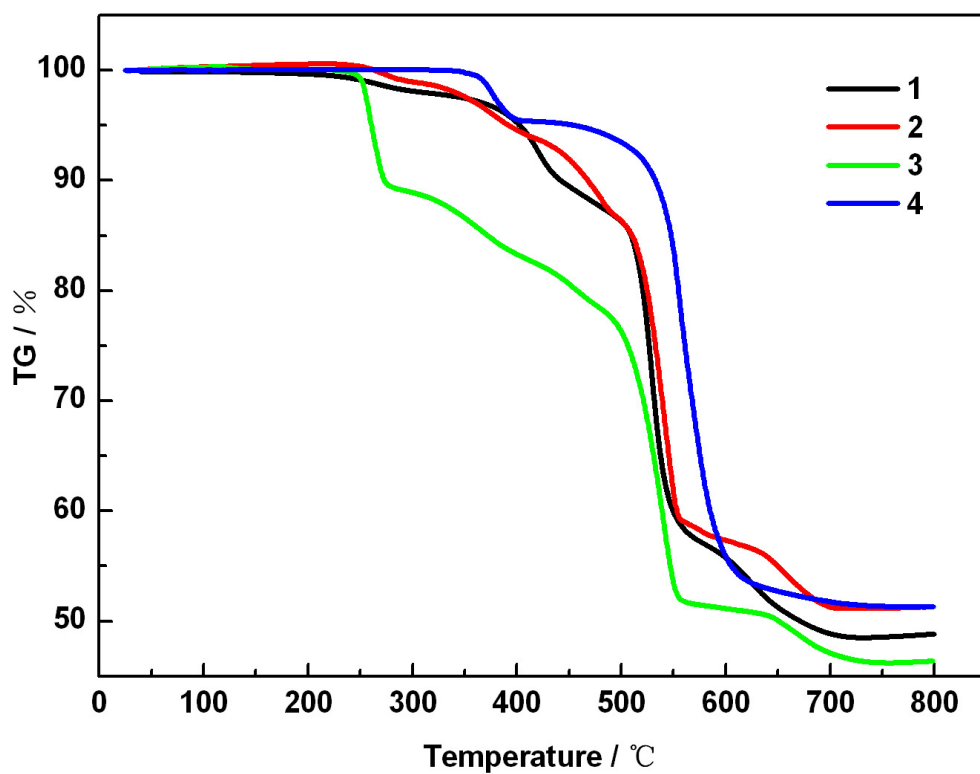

**Fig. S2a** Thermogravimetric analysis of complexes 1–4.

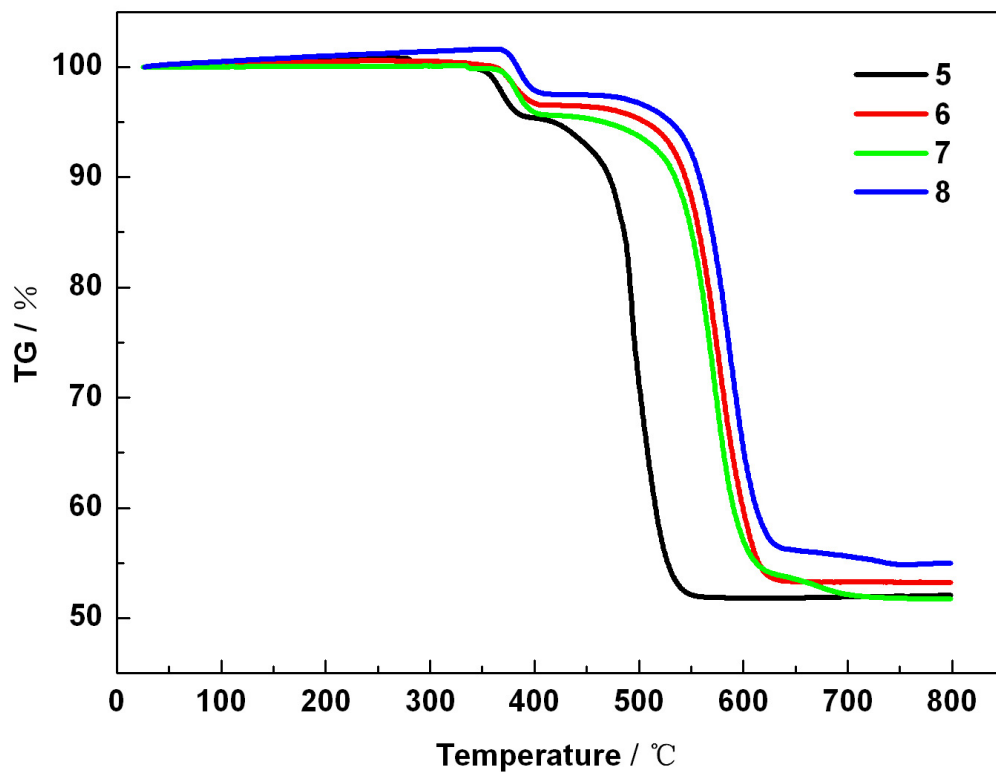

**Fig. S2b** Thermogravimetric analysis of complexes 5–8.
